# Supplementary material
Source: publisher figshare collection journal article supplement (https://acs.figshare.com/ndownloader/files/4483750)

# **SUPPORTING INFORMATION**

For the article:

Biomimetic systems as luminescent nanoprobe for medical imaging

*Ahmed Al-Kattan<sup>1\*</sup>, Pascal Dufour<sup>2</sup>, Jeannette Dexpert-Ghys<sup>3</sup> and Christophe Drouet<sup>1</sup>*

Contacting authors' email address : [ahmed.alkattan@ensiacet.fr](mailto:ahmed.alkattan@ensiacet.fr)

Figure S1: Emission spectra of apatite colloids doped with Eu/(Ca + Eu) initial molar ratios 1, 1.5 and 2 % Eu under excitation at 392.8 nm

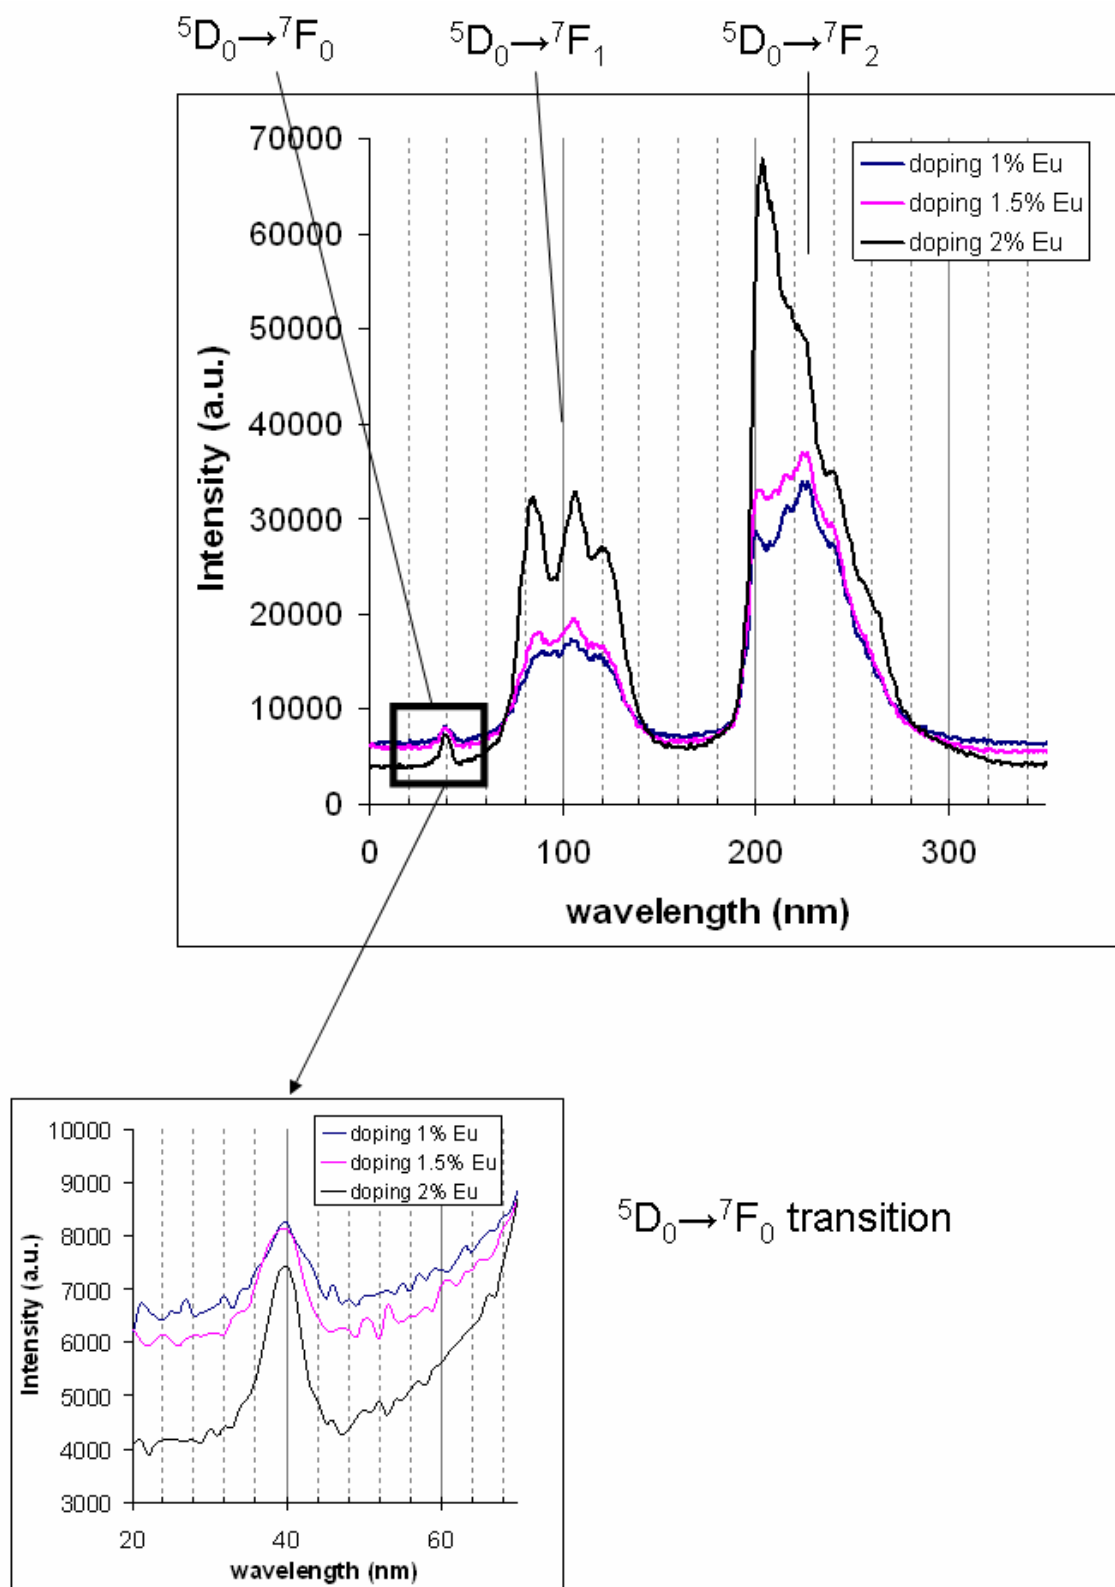

Figure S2: Luminescence decay profiles of the  $^5D_0$  ( $\text{Eu}^{3+}$ ) level for three apatite colloids: 1, 1.5 and 2 % Eu, under excitation at 392.8 nm and at ambient temperature

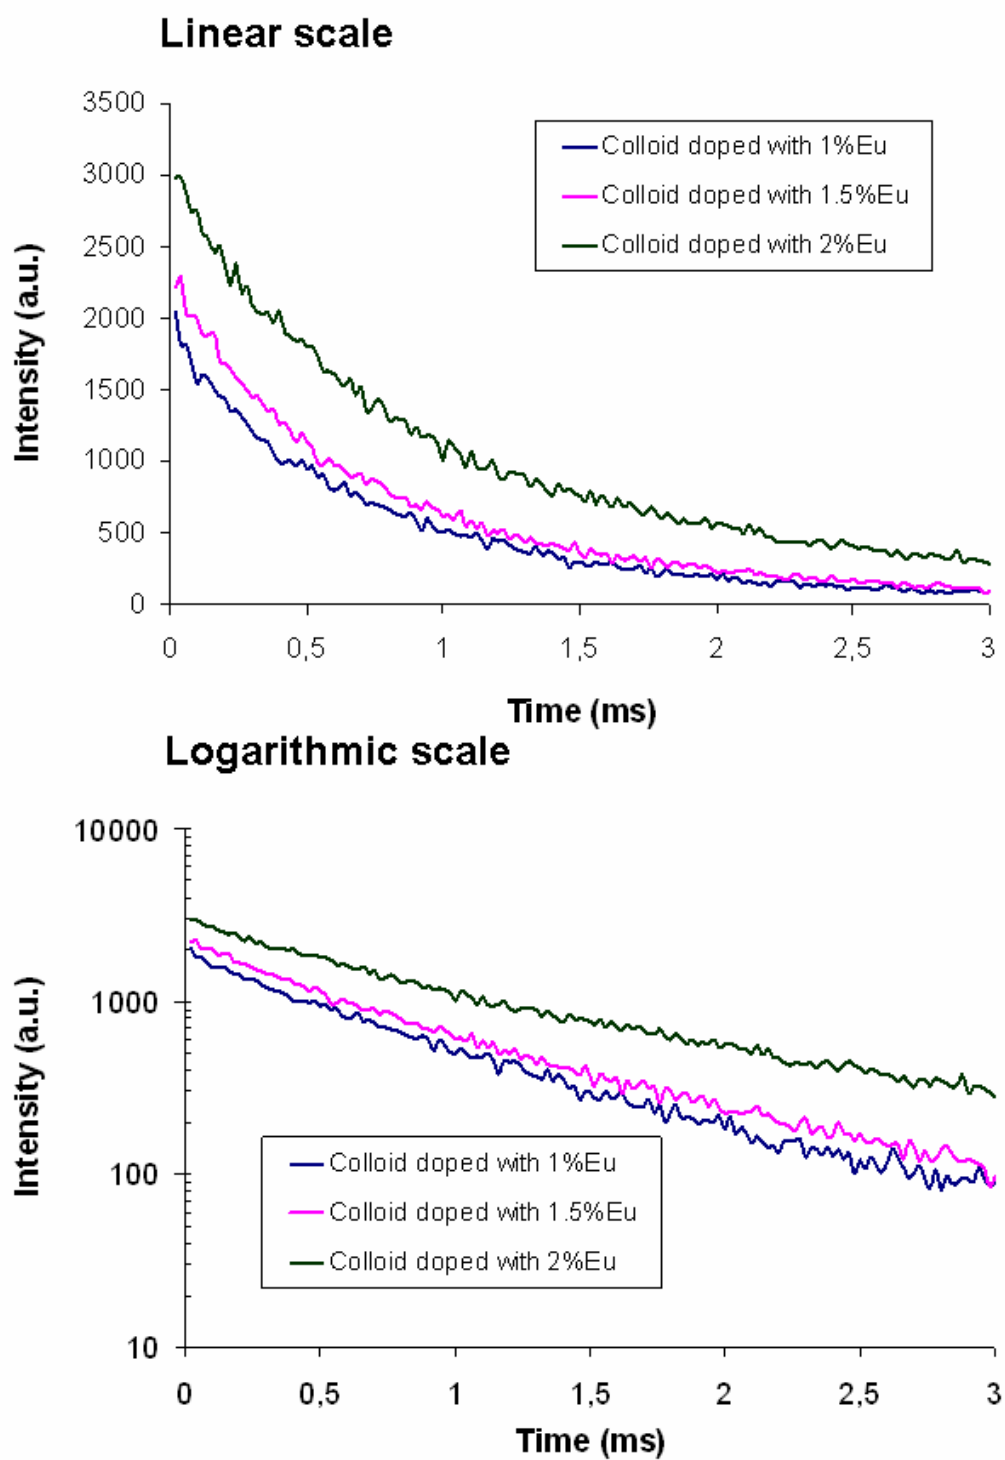

Figure S3: TEM micrograph for apatite colloid prepared from  $\text{Eu}/(\text{Ca}+\text{Eu}) = 1.5 \%$

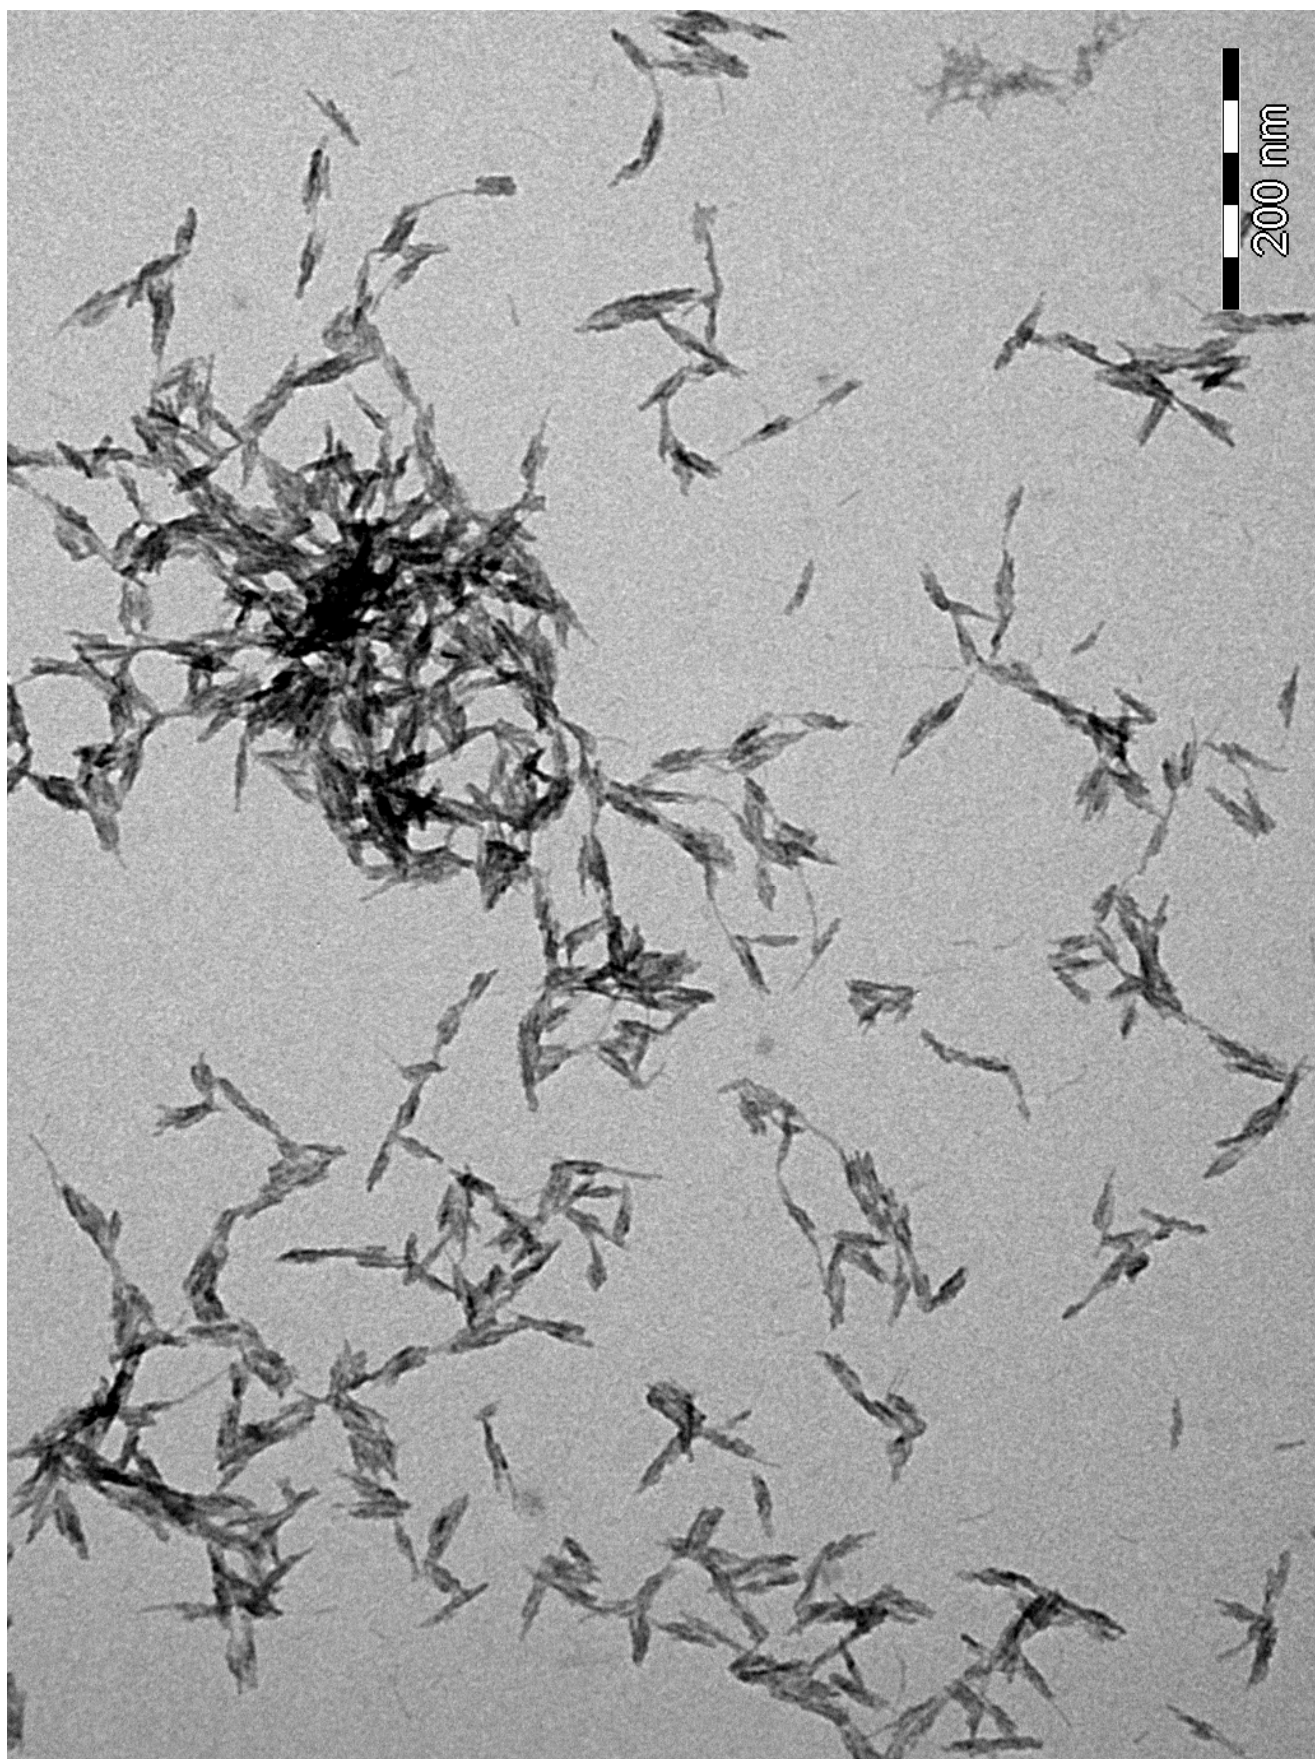

Supplement: Supplementary file 1 [file 4483750]
